# Supplementary material
Source: publisher figshare collection journal article supplement (https://acs.figshare.com/ndownloader/files/3845188)
Supplement: Supplementary file 1 [file 3845188]

**Evidence of Localized Lithium Removal in Layered and Lithiated Spinel  $\text{Li}_{1-x}\text{CoO}_2$  ( $0 \leq x \leq 0.9$ ) under Oxygen Evolution Reaction Conditions**

*Nora Colligan, Veronica Augustyn, and Arumugam Manthiram\**  
Materials Science and Engineering Program & Texas Materials Institute  
The University of Texas at Austin, Austin, TX 78712, USA

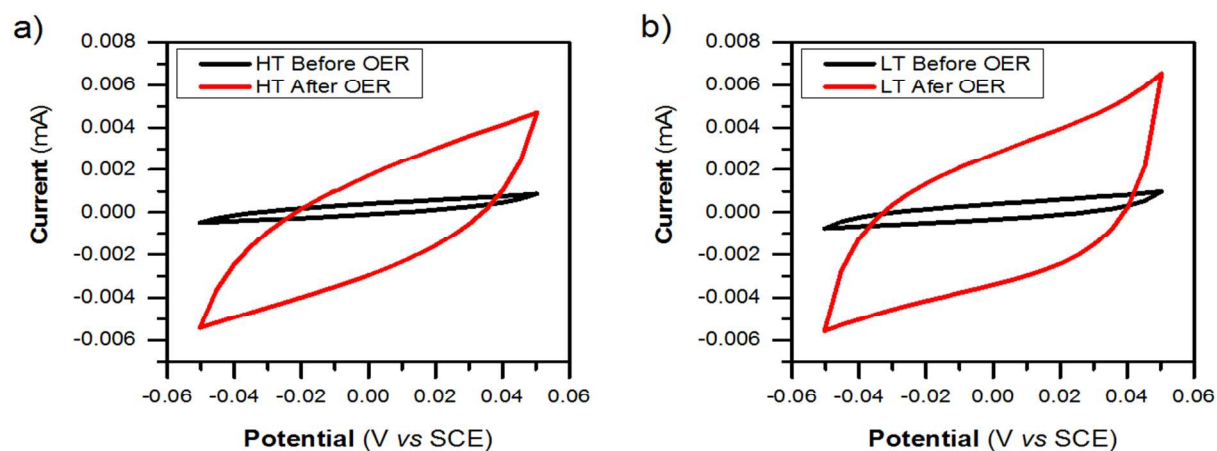

**Figure S1:** CVs of (a) HT-LiCoO<sub>2</sub> and (b) LT-LiCoO<sub>2</sub> in a non-faradaic region, showing the difference in double layer capacitance before and after OER.
